# Supplementary material for: Electrical Characterization of Carbon Nanotube Reinforced Silver and Copper Composites for Switching Contacts
Source: MDPI journal article supplement (doi:10.3390/jcs7070284), 2023-07-11
Supplement: s1 [file s1]

Archive with 1 entries (1 files):
- jcs-2466077-supplementary.pdf
