# Supplementary material for: Electrical Characterization of Carbon Nanotube Reinforced Silver and Copper Composites for Switching Contacts
Source: MDPI journal article supplement (doi:10.3390/jcs7070284), 2023-07-11
Supplement: s1 [file s1 › jcs-2466077-supplementary.pdf]

### Supplementary Material

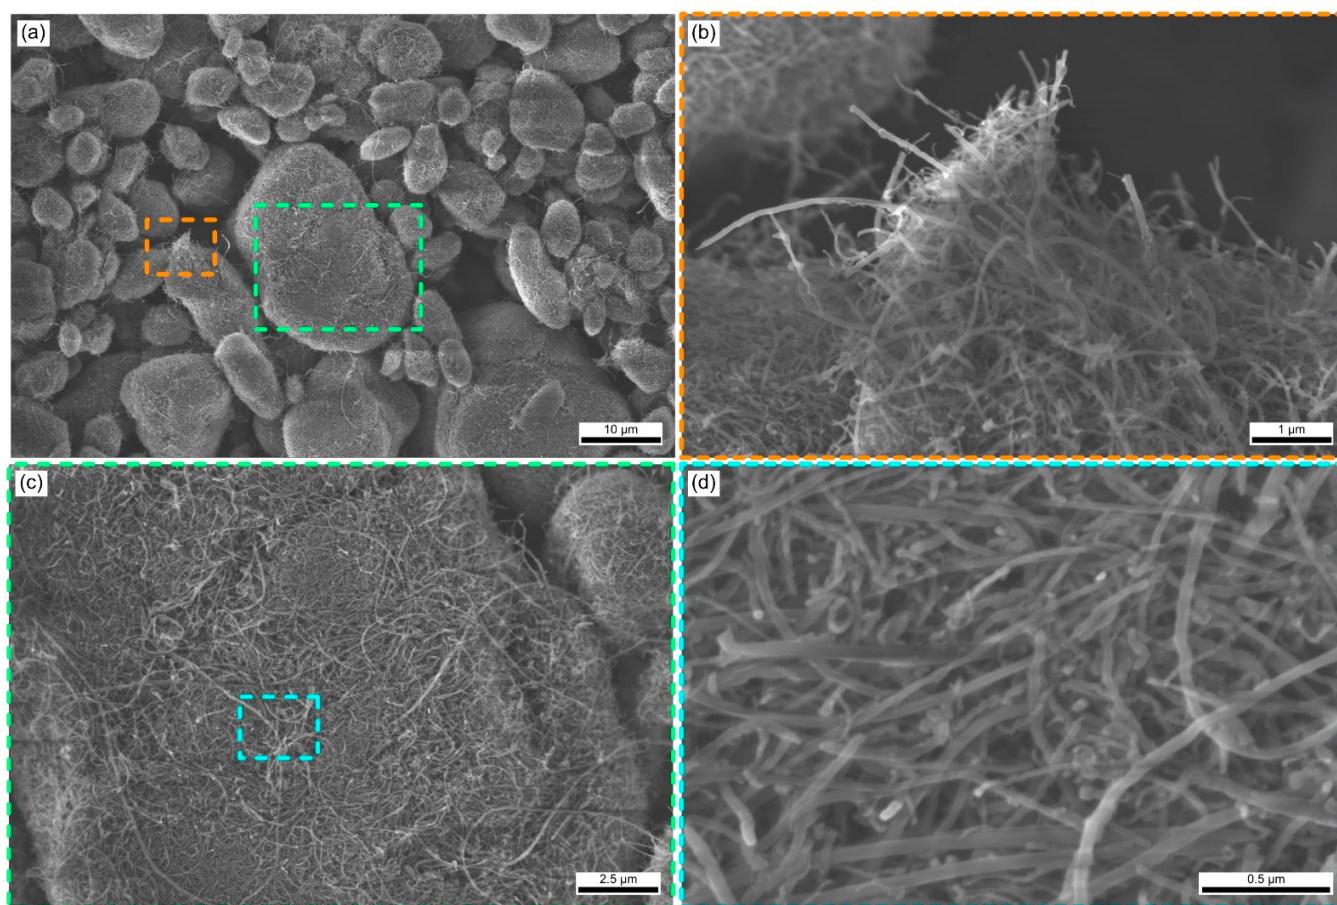

**Figure S1.** SEM micrographs of pristine CNT at different magnifications.

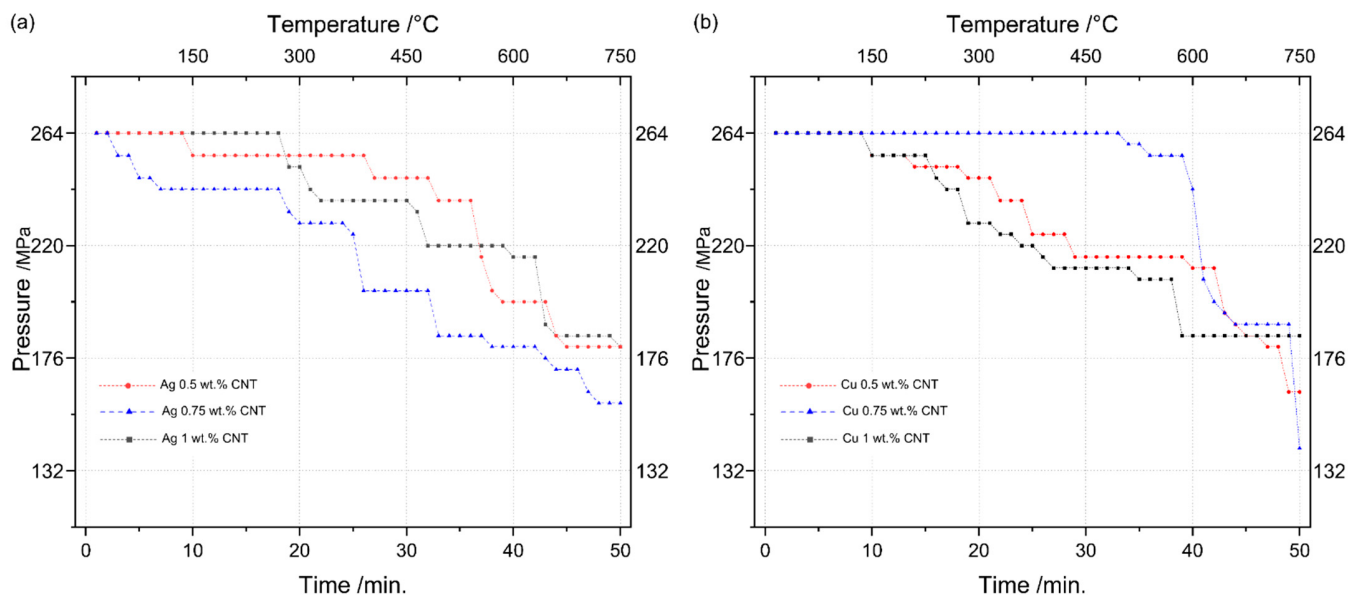

**Figure S2.** Pressure variation during heating stage of HUP for (a) Ag-MMC and (b) Cu-MMC.

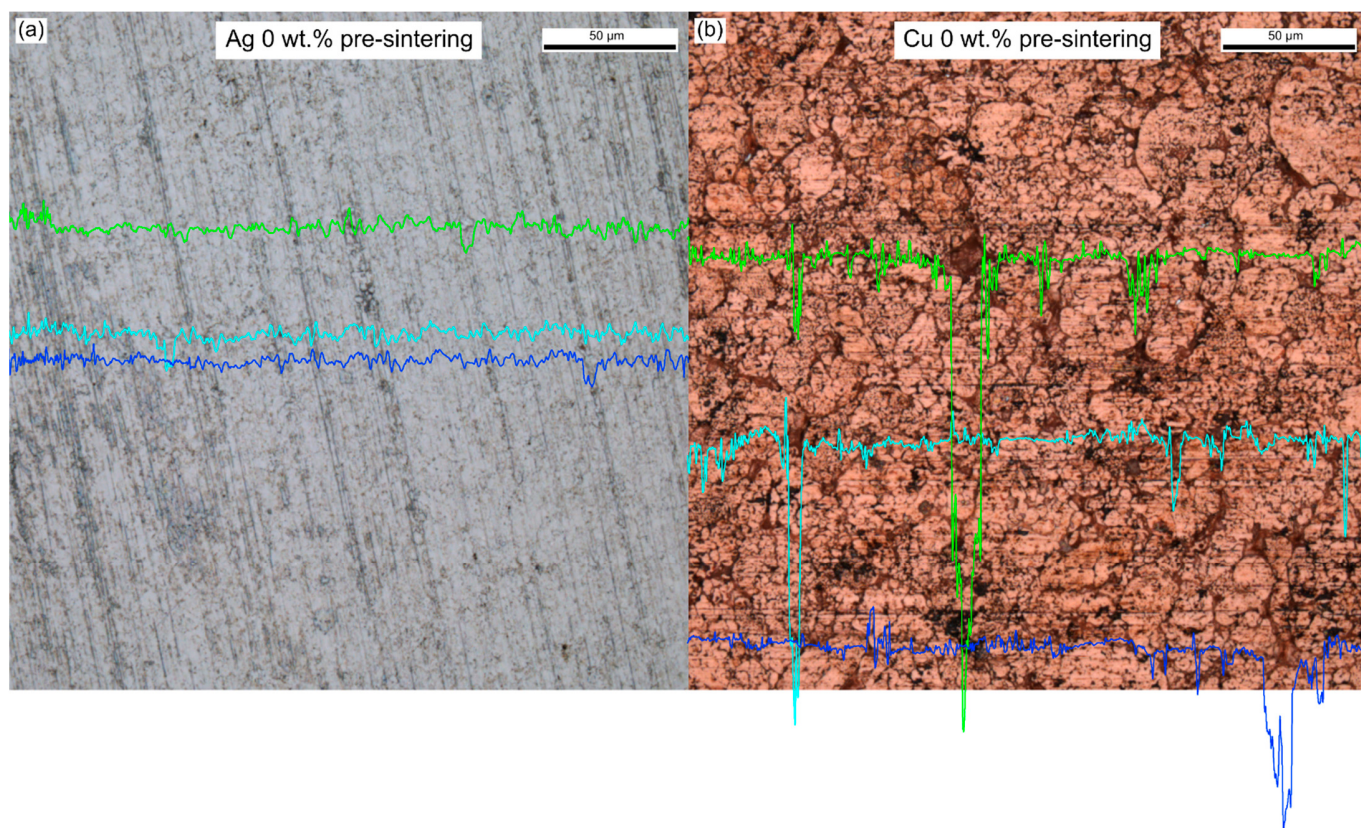

**Figure S3.** 50× surface CLSM scan of green pellets (pre-sintered samples) showing three linear roughness scans in regions with open porosities.

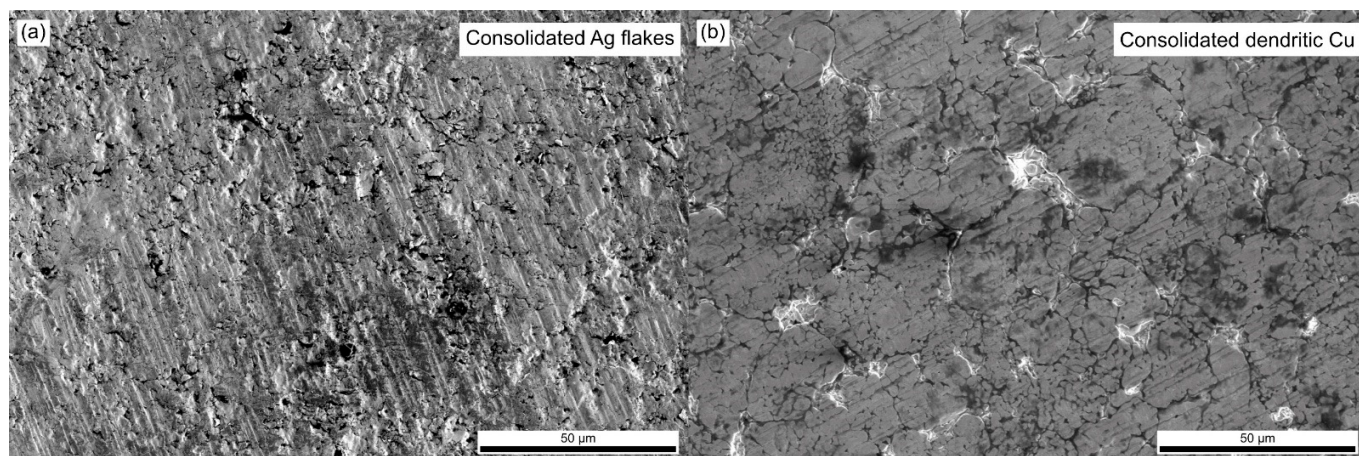

**Figure S4.** Surface SEM micrograph of consolidated a) silver flakes and b) dendritic copper powder.

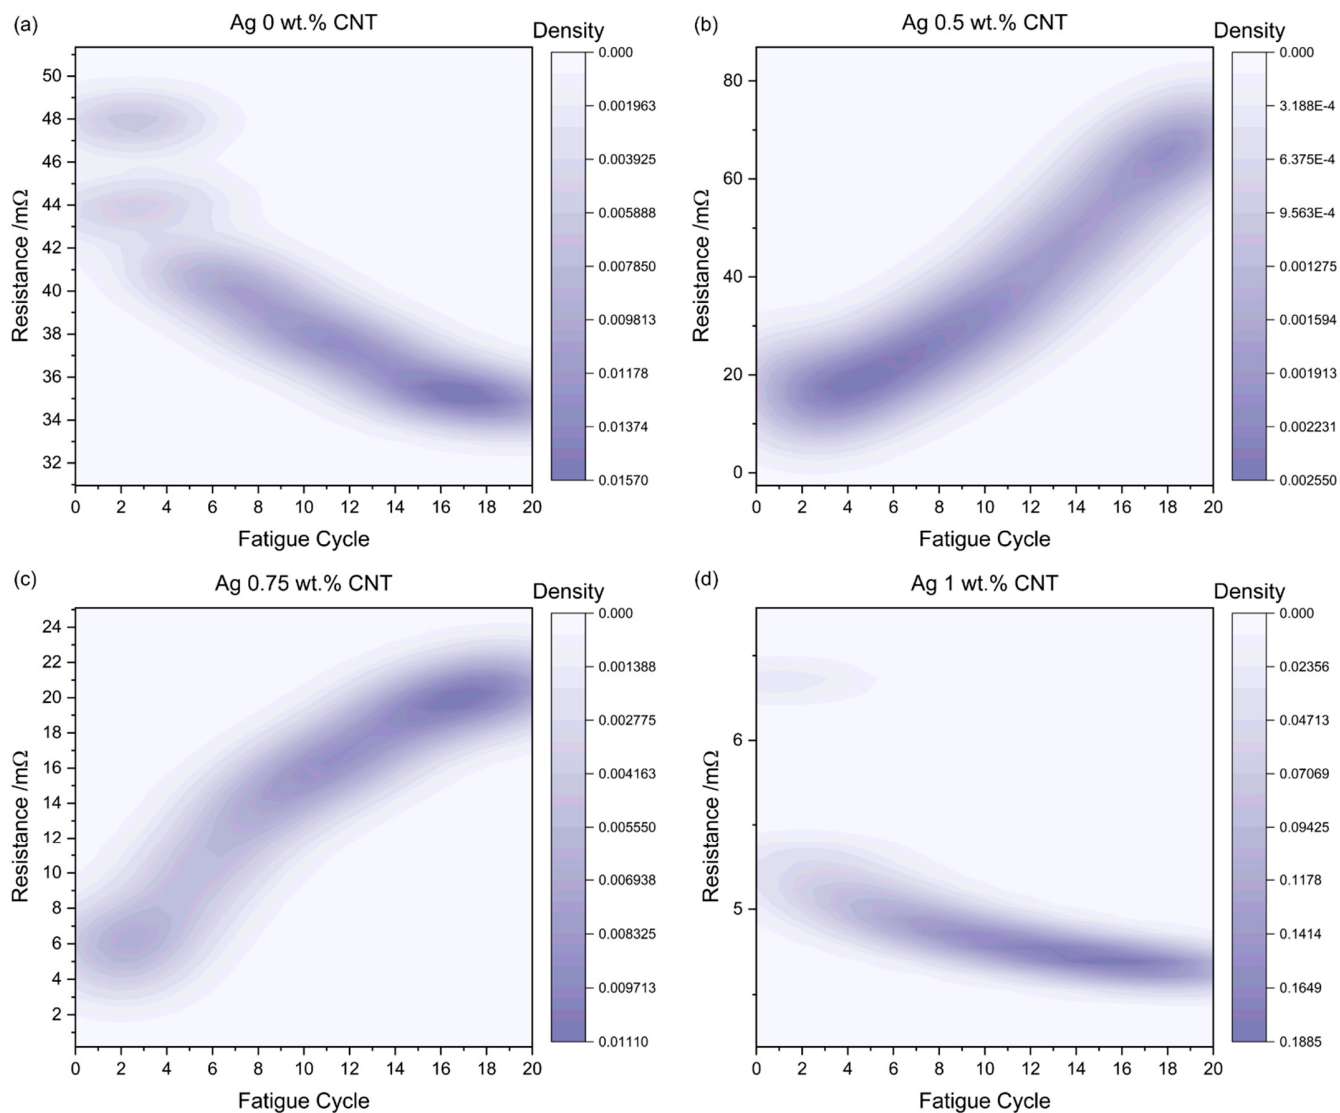

**Figure S5.** Kernel density estimation plot of ECR during multiple fatigue cycles of CNT reinforced Ag matrices. (a) Ag 0%, (b) Ag 0.5%, (c) Ag 0.75%, and (d) Ag 1%. Note the different y-axis ranges.

**Table S1.** Roughness values prior to and post-fatigue tests of silver MMC, as well as approximate imprint diameter left by counter electrode.

|          | Roughness prior to<br>fatigue tests/nm | Roughness post-<br>fatigue tests/nm | Imprint<br>diameter/ $\mu\text{m}$ |
|----------|----------------------------------------|-------------------------------------|------------------------------------|
| Ag 0%    | $10 \pm 10$                            | $30 \pm 10$                         | $58.4 \pm 5.2$                     |
| Ag 0.5%  | $20 \pm 10$                            | $80 \pm 10$                         | $74.8 \pm 8.7$                     |
| Ag 0.75% | $40 \pm 10$                            | $120 \pm 30$                        | $87.5 \pm 2.5$                     |
| Ag 1%    | $60 \pm 10$                            | $100 \pm 10$                        | $76.3 \pm 2.7$                     |

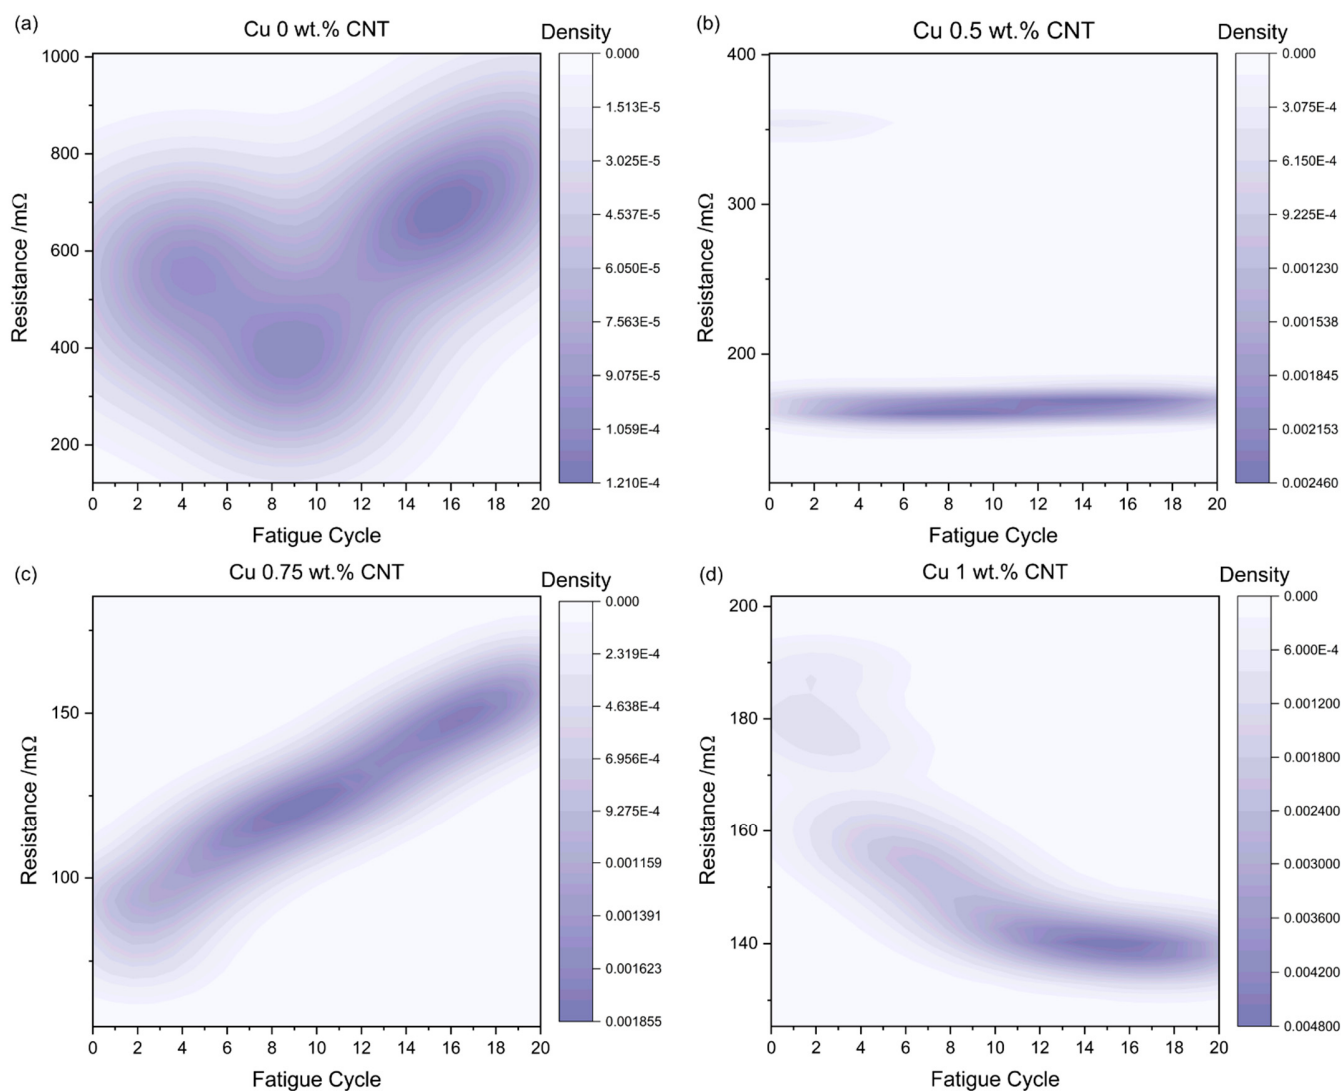

**Figure S6.** Kernel density estimation plot of ECR during multiple fatigue cycles of CNT reinforced Cu matrices. (a) Cu 0%, (b) Cu 0.5%, (c) Cu 0.75%, and (d) Cu 1%. Note the different y-axis ranges.

**Table S2.** Roughness values prior to and post-fatigue tests of copper MMC, as well as approximate imprint diameter left by counter electrode.

|          | Roughness prior to<br>fatigue tests/nm | Roughness post-<br>fatigue tests/nm | Imprint<br>diameter/ $\mu\text{m}$ |
|----------|----------------------------------------|-------------------------------------|------------------------------------|
| Cu 0.5%  | $70 \pm 10$                            | $220 \pm 90$                        | $58.5 \pm 3.5$                     |
| Cu 0.75% | $90 \pm 10$                            | $150 \pm 20$                        | $76.0 \pm 1.6$                     |
| Cu 1%    | $80 \pm 10$                            | $130 \pm 30$                        | $60.1 \pm 3.2$                     |

\* Cu 0% could not be measured. The imprint of the counter electrode could not be observed due to the higher hardness of the reference sample.
